# Supplementary material
Source: MDPI journal article supplement (https://www.mdpi.com/2412-3811/6/12/169)
Supplement: s1 [file s1]

Archive with 1 entries (1 files):
- infrastructures-1438943-supplementary.pdf
